# Supplementary material for: General principles driving the chemical reactivity of titanium(iv) alkoxidesElectronic supplementary information (ESI) available: computational details, final crystal structure in CIF format and charge distribution from the PACHA output for the complexes described in the text. See http://www.rsc.org/suppdata/nj/b3/b312486j/
Source: Royal Society of Chemistry journal article supplement (doi:10.1039/b312486j), 2004-01-01
Supplement: b312486j.doc [file b312486j.doc]

WinPacha downhill simplex report for SOFTOW

[Ti7(µ4-O)2(µ3-O)2(µ2-OEt)8(OEt)12]

New compounds in the chemistry of group 4 transition-metal alkoxides. Part 4.

Synthesis and molecular structures of two polymorphs of [Ti16O16(OEt)32] and

refinement of the structure of [Ti7O4(OEt)20].

J.Chem.Soc.,Dalton Trans., 1999, 1991.

R. Schmid, A. Mosset & J. Galy

V= 3122.12 Å³ (Z = 2) -> No R-value

Initial function value is -23332.2

Number of function evaluations: 889

Vertices of final 25-d simplex and

function values at the vertices:

i 1 2 3 4 5 6 7 function

1 -172.767456 106.953926 -97.984207 -131.890625 187.469467 155.217621 139.491882 -24225.6

2 -172.759521 106.954445 -97.933105 -131.867538 187.458237 155.238541 139.540771 -24225.5

3 -172.757996 106.949867 -97.932693 -131.880386 187.450500 155.236847 139.562164 -24225.5

4 -172.758575 106.952011 -97.985741 -131.875580 187.469681 155.216629 139.492950 -24225.5

5 -172.763641 106.955734 -97.932655 -131.859955 187.449936 155.238770 139.561859 -24225.4

6 -172.765579 106.954491 -97.950943 -131.869324 187.457977 155.229889 139.526642 -24225.5

7 -172.758469 106.954185 -97.958405 -131.870468 187.464645 155.203720 139.514267 -24225.4

8 -172.757446 106.957474 -97.937851 -131.874741 187.459259 155.240036 139.489990 -24225.5

9 -172.760803 106.949600 -97.946991 -131.854935 187.464340 155.241592 139.546295 -24225.4

10 -172.761734 106.949448 -97.935135 -131.864944 187.453568 155.227203 139.542633 -24225.6

11 -172.767090 106.953758 -97.978020 -131.879822 187.456635 155.222778 139.498764 -24225.4

12 -172.760513 106.950371 -97.944038 -131.870621 187.462387 155.232727 139.540421 -24225.4

13 -172.753159 106.952515 -97.942703 -131.877335 187.464645 155.230911 139.514969 -24225.5

14 -172.756302 106.960632 -97.944191 -131.890076 187.464462 155.237213 139.497314 -24225.6

15 -172.762802 106.951118 -97.958183 -131.872086 187.459656 155.229187 139.524506 -24225.5

16 -172.756073 106.959091 -97.941895 -131.890625 187.464371 155.236053 139.501175 -24225.6

17 -172.755417 106.954094 -97.973053 -131.880997 187.465210 155.217438 139.494583 -24225.5

18 -172.751999 106.955482 -97.922691 -131.871979 187.456055 155.242401 139.549118 -24225.5

19 -172.756607 106.953171 -97.919380 -131.874039 187.445679 155.250778 139.562027 -24225.4

20 -172.764633 106.950096 -97.956718 -131.867950 187.459854 155.228638 139.529205 -24225.5

21 -172.756302 106.955963 -97.961868 -131.889862 187.461777 155.226227 139.516693 -24225.6

22 -172.762772 106.953362 -97.950386 -131.865387 187.455399 155.237930 139.532410 -24225.4

23 -172.773773 106.954926 -97.940277 -131.868332 187.451614 155.239304 139.542999 -24225.4

24 -172.753876 106.951202 -97.967155 -131.883530 187.469055 155.221573 139.494370 -24225.5

25 -172.762192 106.951698 -97.962257 -131.868698 187.464874 155.238815 139.514252 -24225.5

26 -172.766647 106.952660 -97.941086 -131.864014 187.452225 155.237045 139.556595 -24225.4

i 8 9 10 11 12 13 14 function

1 160.229355 148.458130 164.682571 35.716476 193.045868 226.166824 156.578262 -24225.6

2 160.235931 148.482895 164.701340 35.735310 193.058945 226.138184 156.580994 -24225.5

3 160.233047 148.487518 164.702240 35.723854 193.046356 226.122574 156.588821 -24225.5

4 160.220139 148.458420 164.690887 35.740765 193.066833 226.179886 156.565323 -24225.5

5 160.226974 148.493347 164.696487 35.765469 193.063965 226.148651 156.581314 -24225.4

6 160.232193 148.475052 164.699295 35.741447 193.062103 226.152054 156.578751 -24225.5

7 160.224243 148.472351 164.690643 35.746140 193.049271 226.157440 156.571136 -24225.4

8 160.231644 148.493454 164.701157 35.737679 193.064865 226.134979 156.586014 -24225.5

9 160.214569 148.455093 164.694794 35.735531 193.054398 226.152695 156.562424 -24225.4

10 160.227829 148.506165 164.700745 35.739616 193.061066 226.134445 156.585526 -24225.6

11 160.213104 148.460297 164.709183 35.748547 193.075150 226.193909 156.574814 -24225.4

12 160.237549 148.483871 164.702515 35.714500 193.052551 226.139877 156.575745 -24225.4

13 160.231735 148.473923 164.699203 35.715988 193.045364 226.138321 156.587540 -24225.5

14 160.252090 148.483368 164.695557 35.714222 193.049881 226.132828 156.592590 -24225.6

15 160.222061 148.471664 164.695084 35.740849 193.057205 226.159271 156.575851 -24225.5

16 160.235580 148.463699 164.708633 35.719635 193.050995 226.140335 156.589172 -24225.6

17 160.215118 148.462036 164.694519 35.740208 193.064697 226.170883 156.570862 -24225.5

18 160.232635 148.482193 164.700470 35.726833 193.058289 226.137482 156.582886 -24225.5

19 160.229691 148.488602 164.705872 35.753323 193.060349 226.139008 156.591461 -24225.4

20 160.232712 148.468262 164.694778 35.730049 193.055405 226.149841 156.576111 -24225.5

21 160.214371 148.467285 164.699219 35.737335 193.067947 226.169708 156.589523 -24225.6

22 160.222733 148.473190 164.701263 35.748219 193.058472 226.156036 156.570313 -24225.4

23 160.237946 148.478500 164.700409 35.754723 193.061859 226.153198 156.587494 -24225.4

24 160.224304 148.460312 164.698105 35.710106 193.054169 226.149933 156.575073 -24225.5

25 160.225418 148.465775 164.689117 35.731102 193.061676 226.157318 156.573257 -24225.5

26 160.227829 148.486130 164.697372 35.752075 193.062378 226.148193 156.576004 -24225.4

i 15 16 17 18 19 20 21 function

1 205.652023 163.841232 189.785538 155.127716 207.751328 209.907745 172.840363 -24225.6

2 205.613190 163.828918 189.794449 155.074005 207.720108 209.890778 172.866776 -24225.5

3 205.609329 163.844513 189.788254 155.089920 207.728775 209.886002 172.847244 -24225.5

4 205.640289 163.817078 189.802399 155.084183 207.750397 209.900589 172.856949 -24225.5

5 205.598099 163.830627 189.787476 155.049713 207.705994 209.890259 172.858688 -24225.4

6 205.619690 163.829834 189.787460 155.076950 207.726746 209.897720 172.861069 -24225.5

7 205.628525 163.829956 189.798050 155.093918 207.736588 209.918991 172.858185 -24225.4

8 205.625046 163.828873 189.784821 155.097565 207.724350 209.891174 172.851044 -24225.5

9 205.617432 163.824402 189.799698 155.069061 207.741165 209.901306 172.864975 -24225.4

10 205.611252 163.821777 189.787918 155.075607 207.725601 209.901611 172.848724 -24225.6

11 205.624542 163.818466 189.782715 155.058441 207.748840 209.922836 172.848389 -24225.4

12 205.621994 163.833954 189.797821 155.085190 207.734528 209.891174 172.855042 -24225.4

13 205.627380 163.830826 189.795380 155.101578 207.733856 209.901215 172.857422 -24225.5

14 205.634064 163.842484 189.782410 155.114639 207.727524 209.870926 172.851379 -24225.6

15 205.626266 163.827332 189.789047 155.087173 207.739212 209.898499 172.844543 -24225.5

16 205.630035 163.833359 189.780579 155.117844 207.735336 209.891479 172.866943 -24225.6

17 205.635712 163.823563 189.792648 155.093094 207.750977 209.903427 172.853180 -24225.5

18 205.609283 163.825241 189.772690 155.075546 207.719940 209.898209 172.864456 -24225.5

19 205.595337 163.824371 189.788376 155.069595 207.712570 209.874588 172.856583 -24225.4

20 205.622406 163.827316 189.786652 155.091446 207.737579 209.904327 172.854370 -24225.5

21 205.627167 163.830887 189.804840 155.081009 207.738495 209.888672 172.855942 -24225.6

22 205.615128 163.821747 189.788544 155.067841 207.734970 209.913803 172.847534 -24225.4

23 205.613647 163.817871 189.775787 155.077835 207.721024 209.885788 172.854950 -24225.4

24 205.640823 163.833832 189.793243 155.116150 207.750992 209.910889 172.849564 -24225.5

25 205.631393 163.831879 189.805634 155.082962 207.737000 209.901154 172.848572 -24225.5

26 205.606796 163.826508 189.792084 155.059006 207.718094 209.903442 172.856522 -24225.4

i 22 23 24 25 function

1 157.941315 181.963669 228.530930 229.668793 -24225.6

2 157.946838 181.980942 228.527634 229.634735 -24225.5

3 157.955505 182.000626 228.526367 229.625931 -24225.5

4 157.934265 181.973114 228.543945 229.677124 -24225.5

5 157.947433 181.990982 228.539658 229.630386 -24225.4

6 157.942993 181.980301 228.539505 229.646133 -24225.5

7 157.943314 181.959946 228.535782 229.659500 -24225.4

8 157.943130 181.987991 228.525467 229.644730 -24225.5

9 157.943161 181.988983 228.535873 229.657700 -24225.4

10 157.949768 181.996552 228.534119 229.637970 -24225.6

11 157.934479 181.971191 228.561905 229.668152 -24225.4

12 157.947006 181.969971 228.530655 229.643814 -24225.4

13 157.946701 181.977097 228.520309 229.642395 -24225.5

14 157.947815 181.962585 228.516251 229.637863 -24225.6

15 157.943802 181.987839 228.541656 229.653702 -24225.5

16 157.949844 181.966644 228.504227 229.640182 -24225.6

17 157.940659 181.970367 228.535049 229.669479 -24225.5

18 157.952271 181.994949 228.520035 229.631104 -24225.5

19 157.953079 181.999557 228.531769 229.619385 -24225.4

20 157.944778 181.987656 228.541260 229.650208 -24225.5

21 157.944061 181.955994 228.530090 229.648849 -24225.6

22 157.943985 181.985397 228.545532 229.651306 -24225.4

23 157.949478 181.995972 228.540268 229.635513 -24225.4

24 157.943970 181.958923 228.527084 229.663223 -24225.5

25 157.937943 181.969391 228.536301 229.658768 -24225.5

26 157.945450 181.993332 228.543823 229.636185 -24225.4

Final solution with -24225.6 value: (ORTEP codes of reference atoms given after the exclamation mark).

-41 C10 1.46000 !40555001 110.00000 !12555001 -172.76746 !3555001

44 C13 1.41000 !14555001 120.00000 !2555001 150.00000 !7555001

-45 C14 1.46000 !44555001 110.00000 !14555001 106.95393 !2555001

60 C29 1.41000 !25555001 175.10001 !6555001 39.80000 !24555001

-61 C30 1.46000 !60555001 110.00000 !25555001 -97.98421 !6555001

-63 C32 1.46000 !62555001 110.00000 !26555001 -131.89063 !6555001

-71 C40 1.46000 !70555001 110.00000 !31555001 187.46947 !4555001

72 H72 1.07300 !32555001 110.00000 !8555001 120.00000 !33555001

73 H73 1.07300 !32555001 110.00000 !8555001 -120.00000 !33555001

-74 H74 1.09600 !33555001 110.00000 !32555001 155.21762 !8555001

75 H75 1.09600 !33555001 110.00000 !74555001 120.00000 !32555001

76 H76 1.09600 !33555001 110.00000 !74555001 -120.00000 !32555001

77 H77 1.07300 !34555001 110.00000 !9555001 120.00000 !35555001

78 H78 1.07300 !34555001 110.00000 !9555001 -120.00000 !35555001

-79 H79 1.09600 !35555001 110.00000 !34555001 139.49188 !9555001

80 H80 1.09600 !35555001 110.00000 !79555001 120.00000 !34555001

81 H81 1.09600 !35555001 110.00000 !79555001 -120.00000 !34555001

82 H82 1.07300 !36555001 110.00000 !37555001 120.00000 !10555001

83 H83 1.07300 !36555001 110.00000 !37555001 -120.00000 !10555001

-84 H84 1.09600 !37555001 110.00000 !36555001 160.22935 !10555001

85 H85 1.09600 !37555001 110.00000 !84555001 120.00000 !36555001

86 H86 1.09600 !37555001 110.00000 !84555001 -120.00000 !36555001

87 H87 1.07300 !38555001 110.00000 !11555001 120.00000 !39555001

88 H88 1.07300 !38555001 110.00000 !11555001 -120.00000 !39555001

-89 H89 1.09600 !39555001 110.00000 !38555001 148.45813 !11555001

90 H90 1.09600 !39555001 110.00000 !89555001 120.00000 !38555001

91 H91 1.09600 !39555001 110.00000 !89555001 -120.00000 !38555001

92 H92 1.07300 !40555001 110.00000 !12555001 120.00000 !41555001

93 H93 1.07300 !40555001 110.00000 !12555001 -120.00000 !41555001

-94 H94 1.09600 !41555001 110.00000 !40555001 164.68257 !12555001

95 H95 1.09600 !41555001 110.00000 !94555001 120.00000 !40555001

96 H96 1.09600 !41555001 110.00000 !94555001 -120.00000 !40555001

97 H97 1.07300 !42555001 110.00000 !13555001 120.00000 !43555001

98 H98 1.07300 !42555001 110.00000 !13555001 -120.00000 !43555001

-99 H99 1.09600 !43555001 110.18000 !42555001 35.71648 !13555001

100 H100 1.09600 !43555001 110.00000 !99555001 120.00000 !42555001

101 H101 1.09600 !43555001 110.00000 !99555001 -120.00000 !42555001

102 H102 1.07300 !46555001 110.00000 !15555001 120.00000 !47555001

103 H103 1.07300 !46555001 110.00000 !15555001 -120.00000 !47555001

-104 H104 1.09600 !47555001 110.00000 !46555001 193.04587 !15555001

105 H105 1.09600 !47555001 110.00000 !104555001 120.00000 !46555001

106 H106 1.09600 !47555001 110.00000 !104555001 -120.00000 !46555001

107 H107 1.07300 !48555001 110.00000 !16555001 120.00000 !49555001

108 H108 1.07300 !48555001 110.00000 !16555001 -120.00000 !49555001

-109 H109 1.09600 !49555001 110.00000 !48555001 226.16682 !16555001

110 H110 1.09600 !49555001 110.00000 !109555001 120.00000 !48555001

111 H111 1.09600 !49555001 110.00000 !109555001 -120.00000 !48555001

112 H112 1.07300 !50555001 110.00000 !17555001 120.00000 !51555001

113 H113 1.07300 !50555001 110.00000 !17555001 -120.00000 !51555001

-114 H114 1.09600 !51555001 110.00000 !50555001 156.57826 !17555001

115 H115 1.09600 !51555001 110.00000 !114555001 120.00000 !50555001

116 H116 1.09600 !51555001 110.00000 !114555001 -120.00000 !50555001

117 H117 1.07300 !52555001 110.00000 !21555001 120.00000 !53555001

118 H118 1.07300 !52555001 110.00000 !21555001 -120.00000 !53555001

-119 H119 1.09600 !53555001 110.00000 !52555001 205.65202 !21555001

120 H120 1.09600 !53555001 110.00000 !119555001 120.00000 !52555001

121 H121 1.09600 !53555001 110.00000 !119555001 -120.00000 !52555001

122 H122 1.07300 !54555001 110.00000 !22555001 120.00000 !55555001

123 H123 1.07300 !54555001 110.00000 !22555001 -120.00000 !55555001

-124 H124 1.09600 !55555001 110.00000 !54555001 163.84123 !22555001

125 H125 1.09600 !55555001 110.00000 !124555001 120.00000 !54555001

126 H126 1.09600 !55555001 110.00000 !124555001 -120.00000 !54555001

127 H127 1.07300 !56555001 110.00000 !23555001 120.00000 !57555001

128 H128 1.07300 !56555001 110.00000 !23555001 -120.00000 !57555001

-129 H129 1.09600 !57555001 110.00000 !56555001 189.78554 !23555001

130 H130 1.09600 !57555001 110.00000 !129555001 120.00000 !56555001

131 H131 1.09600 !57555001 110.00000 !129555001 -120.00000 !56555001

132 H132 1.07300 !58555001 110.00000 !24555001 120.00000 !59555001

133 H133 1.07300 !58555001 110.00000 !24555001 -120.00000 !59555001

-134 H134 1.09600 !59555001 110.00000 !58555001 155.12772 !24555001

135 H135 1.09600 !59555001 110.00000 !134555001 120.00000 !58555001

136 H136 1.09600 !59555001 110.00000 !134555001 -120.00000 !58555001

137 H137 1.07300 !64555001 110.00000 !27555001 120.00000 !65555001

138 H138 1.07300 !64555001 110.00000 !27555001 -120.00000 !65555001

-139 H139 1.09600 !65555001 110.00000 !64555001 207.75133 !27555001

140 H140 1.09600 !65555001 110.00000 !139555001 120.00000 !64555001

141 H141 1.09600 !65555001 110.00000 !139555001 -120.00000 !64555001

142 H142 1.07300 !66555001 110.00000 !28555001 120.00000 !67555001

143 H143 1.07300 !66555001 110.00000 !28555001 -120.00000 !67555001

-144 H144 1.09600 !67555001 110.00000 !66555001 209.90775 !28555001

145 H145 1.09600 !67555001 110.00000 !144555001 120.00000 !66555001

146 H146 1.09600 !67555001 110.00000 !144555001 -120.00000 !66555001

147 H147 1.07300 !68555001 110.00000 !30555001 120.00000 !69555001

148 H148 1.07300 !68555001 110.00000 !30555001 -120.00000 !69555001

-149 H149 1.09600 !69555001 110.00000 !68555001 172.84036 !30555001

150 H150 1.09600 !69555001 110.00000 !149555001 120.00000 !68555001

151 H151 1.09600 !69555001 110.00000 !149555001 -120.00000 !68555001

152 H152 1.07300 !70555001 110.00000 !31555001 120.00000 !71555001

153 H153 1.07300 !70555001 110.00000 !31555001 -120.00000 !71555001

-154 H154 1.09600 !71555001 110.00000 !70555001 157.94131 !31555001

155 H155 1.09600 !71555001 110.00000 !154555001 120.00000 !70555001

156 H156 1.09600 !71555001 110.00000 !154555001 -120.00000 !70555001

157 H157 1.07300 !62555001 110.00000 !26555001 120.00000 !63555001

158 H158 1.07300 !62555001 110.00000 !26555001 -120.00000 !63555001

-159 H159 1.09600 !63555001 110.00000 !62555001 181.96367 !26555001

160 H160 1.09600 !63555001 110.00000 !159555001 120.00000 !62555001

161 H161 1.09600 !63555001 110.00000 !159555001 -120.00000 !62555001

162 H162 1.07300 !44555001 110.00000 !14555001 120.00000 !45555001

163 H163 1.07300 !44555001 110.00000 !14555001 -120.00000 !45555001

-164 H164 1.09600 !45555001 110.00000 !44555001 228.53093 !14555001

165 H165 1.09600 !45555001 110.00000 !164555001 120.00000 !44555001

166 H166 1.09600 !45555001 110.00000 !164555001 -120.00000 !44555001

167 H167 1.07300 !60555001 110.00000 !25555001 120.00000 !61555001

168 H168 1.07300 !60555001 110.00000 !25555001 -120.00000 !61555001

-169 H169 1.09600 !61555001 110.00000 !60555001 229.66879 !25555001

170 H170 1.09600 !61555001 110.00000 !169555001 120.00000 !60555001

171 H171 1.09600 !61555001 110.00000 !169555001 -120.00000 !60555001

max value = -23255.7

WinPacha atomic charges calculations report for SOFTOW

[Ti7(µ4-O)2(µ3-O)2(µ2-OEt)8(OEt)12]

V= 3122.12 Å³ (Z = 2) -> No R-value

***Atomic electronegativies (eV) and radii (pm) ***

Ti( 8.170, 147.7)

O( 21.360, 45.0)

C( 15.050, 62.0)

H( 13.610, 53.0)

Madelung summation with gaussian inner-charge scaling (G = 0.13 Å-1)

Reciprocal space exploration: -2 <= (h, k, l) <= 2

Madelung constant A = 486.5287241/2 = 243.2643621 (dmin = 1.073 Å )

min = -0.25342 Å-1 < mean = 0.22697 Å-1 < max = 2.00368 Å-1

Total electrostatic balance = -6529.26 eV = -629972.3 kJ.mol-1

Mean electronegativity: <EN> = 12.64 eV

Global hardness: <GH> = 1.77 eV (G = 0.13 Å-1)

Electronic signature: #n Label(±ox)[CN] = ±q {±f}

Atom Charge Fukui

#18 O11(-2)[ 4] = -0.927 { 0.000}

#20 O13(-2)[ 4] = -0.926 { 0.000}

#19 O12(-2)[ 3] = -0.825 { 0.000}

#29 O22(-2)[ 3] = -0.823 { 0.000}

#9 O2(-2)[ 3] = -0.670 { 0.000}

#17 O10(-2)[ 3] = -0.669 { 0.000}

#14 O7(-2)[ 3] = -0.663 { 0.000}

#24 O17(-2)[ 3] = -0.660 { 0.000}

#10 O3(-2)[ 3] = -0.653 { 0.000}

#27 O20(-2)[ 3] = -0.647 { 0.000}

#22 O15(-2)[ 3] = -0.603 { 0.000}

#8 O1(-2)[ 3] = -0.599 { 0.000}

#23 O16(-2)[ 2] = -0.566 { 0.000}

#15 O8(-2)[ 2] = -0.561 { 0.000}

#13 O6(-2)[ 2] = -0.561 { 0.000}

#26 O19(-2)[ 2] = -0.553 { 0.000}

#11 O4(-2)[ 2] = -0.550 { 0.000}

#25 O18(-2)[ 2] = -0.545 { 0.000}

#12 O5(-2)[ 2] = -0.545 { 0.000}

#31 O24(-2)[ 2] = -0.543 { 0.000}

#28 O21(-2)[ 2] = -0.540 { 0.000}

#30 O23(-2)[ 2] = -0.539 { 0.000}

#16 O9(-2)[ 2] = -0.538 { 0.000}

#21 O14(-2)[ 2] = -0.535 { 0.000}

#35 C4(-3)[ 4] = -0.121 { 0.000}

#51 C20(-3)[ 4] = -0.121 { 0.000}

#55 C24(-3)[ 4] = -0.120 { 0.000}

#39 C8(-3)[ 4] = -0.117 { 0.000}

#33 C2(-3)[ 4] = -0.116 { 0.000}

#65 C34(-3)[ 4] = -0.116 { 0.000}

#37 C6(-3)[ 4] = -0.115 { 0.000}

#61 C30(-3)[ 4] = -0.113 { 0.000}

#45 C14(-3)[ 4] = -0.112 { 0.000}

#57 C26(-3)[ 4] = -0.111 { 0.000}

#59 C28(-3)[ 4] = -0.111 { 0.000}

#53 C22(-3)[ 4] = -0.111 { 0.000}

#43 C12(-3)[ 4] = -0.110 { 0.000}

#47 C16(-3)[ 4] = -0.110 { 0.000}

#49 C18(-3)[ 4] = -0.110 { 0.000}

#63 C32(-3)[ 4] = -0.110 { 0.000}

#71 C40(-3)[ 4] = -0.110 { 0.000}

#41 C10(-3)[ 4] = -0.109 { 0.000}

#67 C36(-3)[ 4] = -0.109 { 0.000}

#69 C38(-3)[ 4] = -0.108 { 0.000}

#64 C33(-1)[ 4] = -0.054 { 0.000}

#54 C23(-1)[ 4] = -0.053 { 0.000}

#50 C19(-1)[ 4] = -0.052 { 0.000}

#36 C5(-1)[ 4] = -0.051 { 0.000}

#34 C3(-1)[ 4] = -0.050 { 0.000}

#44 C13(-1)[ 4] = -0.050 { 0.000}

#58 C27(-1)[ 4] = -0.049 { 0.000}

#32 C1(-1)[ 4] = -0.041 { 0.000}

#66 C35(-1)[ 4] = -0.021 { 0.000}

#48 C17(-1)[ 4] = -0.018 { 0.000}

#62 C31(-1)[ 4] = -0.018 { 0.000}

#40 C9(-1)[ 4] = -0.017 { 0.000}

#52 C21(-1)[ 4] = -0.017 { 0.000}

#68 C37(-1)[ 4] = -0.016 { 0.000}

#46 C15(-1)[ 4] = -0.015 { 0.000}

#70 C39(-1)[ 4] = -0.014 { 0.000}

#56 C25(-1)[ 4] = -0.013 { 0.000}

#42 C11(-1)[ 4] = -0.011 { 0.000}

#60 C29(-1)[ 4] = -0.007 { 0.000}

#75 H75(+1)[ 1] = -0.004 { 0.000}

#163 H163(+1)[ 1] = -0.002 { 0.000}

#162 H162(+1)[ 1] = +0.001 { 0.000}

#125 H125(+1)[ 1] = +0.001 { 0.000}

#132 H132(+1)[ 1] = +0.003 { 0.000}

#157 H157(+1)[ 1] = +0.005 { 0.000}

#83 H83(+1)[ 1] = +0.006 { 0.000}

#133 H133(+1)[ 1] = +0.009 { 0.000}

#78 H78(+1)[ 1] = +0.009 { 0.000}

#137 H137(+1)[ 1] = +0.009 { 0.000}

#77 H77(+1)[ 1] = +0.011 { 0.000}

#38 C7(-1)[ 4] = +0.013 { 0.000}

#118 H118(+1)[ 1] = +0.014 { 0.000}

#113 H113(+1)[ 1] = +0.014 { 0.000}

#123 H123(+1)[ 1] = +0.014 { 0.000}

#112 H112(+1)[ 1] = +0.014 { 0.000}

#97 H97(+1)[ 1] = +0.014 { 0.000}

#108 H108(+1)[ 1] = +0.015 { 0.000}

#88 H88(+1)[ 1] = +0.016 { 0.000}

#143 H143(+1)[ 1] = +0.016 { 0.000}

#80 H80(+1)[ 1] = +0.016 { 0.000}

#126 H126(+1)[ 1] = +0.016 { 0.000}

#147 H147(+1)[ 1] = +0.017 { 0.000}

#102 H102(+1)[ 1] = +0.017 { 0.000}

#98 H98(+1)[ 1] = +0.017 { 0.000}

#73 H73(+1)[ 1] = +0.018 { 0.000}

#127 H127(+1)[ 1] = +0.018 { 0.000}

#115 H115(+1)[ 1] = +0.019 { 0.000}

#103 H103(+1)[ 1] = +0.019 { 0.000}

#82 H82(+1)[ 1] = +0.019 { 0.000}

#138 H138(+1)[ 1] = +0.021 { 0.000}

#93 H93(+1)[ 1] = +0.021 { 0.000}

#153 H153(+1)[ 1] = +0.021 { 0.000}

#148 H148(+1)[ 1] = +0.022 { 0.000}

#76 H76(+1)[ 1] = +0.022 { 0.000}

#152 H152(+1)[ 1] = +0.023 { 0.000}

#92 H92(+1)[ 1] = +0.023 { 0.000}

#142 H142(+1)[ 1] = +0.024 { 0.000}

#87 H87(+1)[ 1] = +0.024 { 0.000}

#117 H117(+1)[ 1] = +0.026 { 0.000}

#128 H128(+1)[ 1] = +0.026 { 0.000}

#85 H85(+1)[ 1] = +0.026 { 0.000}

#107 H107(+1)[ 1] = +0.027 { 0.000}

#158 H158(+1)[ 1] = +0.027 { 0.000}

#116 H116(+1)[ 1] = +0.027 { 0.000}

#140 H140(+1)[ 1] = +0.028 { 0.000}

#135 H135(+1)[ 1] = +0.028 { 0.000}

#167 H167(+1)[ 1] = +0.029 { 0.000}

#166 H166(+1)[ 1] = +0.029 { 0.000}

#165 H165(+1)[ 1] = +0.031 { 0.000}

#168 H168(+1)[ 1] = +0.031 { 0.000}

#81 H81(+1)[ 1] = +0.032 { 0.000}

#141 H141(+1)[ 1] = +0.033 { 0.000}

#89 H89(+1)[ 1] = +0.033 { 0.000}

#149 H149(+1)[ 1] = +0.033 { 0.000}

#104 H104(+1)[ 1] = +0.034 { 0.000}

#101 H101(+1)[ 1] = +0.034 { 0.000}

#129 H129(+1)[ 1] = +0.034 { 0.000}

#94 H94(+1)[ 1] = +0.034 { 0.000}

#84 H84(+1)[ 1] = +0.034 { 0.000}

#154 H154(+1)[ 1] = +0.034 { 0.000}

#144 H144(+1)[ 1] = +0.034 { 0.000}

#109 H109(+1)[ 1] = +0.035 { 0.000}

#159 H159(+1)[ 1] = +0.035 { 0.000}

#119 H119(+1)[ 1] = +0.035 { 0.000}

#74 H74(+1)[ 1] = +0.035 { 0.000}

#72 H72(+1)[ 1] = +0.036 { 0.000}

#134 H134(+1)[ 1] = +0.036 { 0.000}

#170 H170(+1)[ 1] = +0.036 { 0.000}

#86 H86(+1)[ 1] = +0.036 { 0.000}

#124 H124(+1)[ 1] = +0.036 { 0.000}

#139 H139(+1)[ 1] = +0.037 { 0.000}

#91 H91(+1)[ 1] = +0.037 { 0.000}

#164 H164(+1)[ 1] = +0.037 { 0.000}

#136 H136(+1)[ 1] = +0.037 { 0.000}

#79 H79(+1)[ 1] = +0.037 { 0.000}

#122 H122(+1)[ 1] = +0.037 { 0.000}

#169 H169(+1)[ 1] = +0.037 { 0.000}

#110 H110(+1)[ 1] = +0.038 { 0.000}

#130 H130(+1)[ 1] = +0.039 { 0.000}

#171 H171(+1)[ 1] = +0.039 { 0.000}

#114 H114(+1)[ 1] = +0.039 { 0.000}

#131 H131(+1)[ 1] = +0.039 { 0.000}

#105 H105(+1)[ 1] = +0.039 { 0.000}

#160 H160(+1)[ 1] = +0.040 { 0.000}

#100 H100(+1)[ 1] = +0.040 { 0.000}

#156 H156(+1)[ 1] = +0.041 { 0.000}

#106 H106(+1)[ 1] = +0.041 { 0.000}

#96 H96(+1)[ 1] = +0.041 { 0.000}

#120 H120(+1)[ 1] = +0.042 { 0.000}

#151 H151(+1)[ 1] = +0.043 { 0.000}

#145 H145(+1)[ 1] = +0.043 { 0.000}

#99 H99(+1)[ 1] = +0.044 { 0.000}

#155 H155(+1)[ 1] = +0.044 { 0.000}

#161 H161(+1)[ 1] = +0.044 { 0.000}

#95 H95(+1)[ 1] = +0.045 { 0.000}

#121 H121(+1)[ 1] = +0.045 { 0.000}

#150 H150(+1)[ 1] = +0.045 { 0.000}

#90 H90(+1)[ 1] = +0.045 { 0.000}

#111 H111(+1)[ 1] = +0.048 { 0.000}

#146 H146(+1)[ 1] = +0.048 { 0.000}

#1 Ti1(+4)[ 6] = +1.547 { 0.000}

#4 Ti4(+4)[ 6] = +2.232 { 0.000}

#3 Ti3(+4)[ 6] = +2.242 { 0.000}

#5 Ti5(+4)[ 6] = +2.261 { 0.000}

#2 Ti2(+4)[ 6] = +2.266 { 0.000}

#6 Ti6(+4)[ 6] = +2.348 { 0.000}

#7 Ti7(+4)[ 6] = +2.364 { 0.000}

Partial electrostatic balance: <EB> = -453.53 eV = -43758.1 kJ.mol-1

Reduced electrostatic balance: <EB/2> = -226.76 eV = -21879.1 kJ.mol-1

Global ionicity: <GI> = 26.36 %

Statistical report: <Atom>[num] = mean ± 3×stdev (stdev) <avdev>

<q(H)>[100] = 0.028 ± 0.038 (0.013) <0.011>

<f(H)>[100] = 0.000 ± 0.000 (0.000) <0.000>

<q(C)>[40] = -0.070 ± 0.137 (0.046) <0.043>

<f(C)>[40] = 0.000 ± 0.000 (0.000) <0.000>

<q(O)>[24] = -0.635 ± 0.364 (0.121) <0.093>

<f(O)>[24] = 0.000 ± 0.000 (0.000) <0.000>

<q(Ti)>[7] = 2.180 ± 0.851 (0.284) <0.181>

<f(Ti)>[7] = 0.000 ± 0.000 (0.000) <0.000>

WinPacha atomic charges calculations report for 993

C39H96O24Ti7 ->

AUT Dupont Karl

Dupont Karl

V= 3101.76 Å³ (Z = 2) -> Rval = 0.00% T = 173K

***Atomic electronegativies (eV) and radii (pm) ***

Ti( 8.170, 147.7)

O( 21.360, 45.0)

C( 15.050, 62.0)

H( 13.610, 53.0)

Madelung summation with gaussian inner-charge scaling (G = 0.13 Å-1)

Reciprocal space exploration: -2 <= (h, k, l) <= 2

Madelung constant A = 459.9051255/2 = 229.9525627 (dmin = 0.9469 Å )

min = -0.25299 Å-1 < mean = 0.23115 Å-1 < max = 2.33880 Å-1

Total electrostatic balance = -6993.670 eV = -674780.5 kJ.mol-1

Mean electronegativity: <EN> = 12.524 eV

Global hardness: <GH> = 1.80 eV (G = 0.13 Å-1)

Electronic signature: #n Label(±ox)[CN] = ±q {±f}

Atom Charge Fukui

#8 O1(-2)[ 4] = -0.9139 { -0.0035}

#10 O3(-2)[ 4] = -0.9123 { -0.0034}

#9 O2(-2)[ 3] = -0.8200 { -0.0014}

#11 O4(-2)[ 3] = -0.8157 { -0.0016}

#17 O7(-2)[ 3] = -0.6618 { -0.0002}

#44 O16(-2)[ 3] = -0.6617 { -0.0003}

#35 O13(-2)[ 3] = -0.6569 { 0.0001}

#53 O19(-2)[ 3] = -0.6557 { 0.0000}

#59 O21(-2)[ 3] = -0.6538 { 0.0001}

#26 O10(-2)[ 3] = -0.6501 { -0.0000}

#12 O5(-2)[ 3] = -0.5959 { 0.0010}

#16 O6(-2)[ 3] = -0.5956 { 0.0010}

#56 O20(-2)[ 2] = -0.5729 { 0.0016}

#32 O12(-2)[ 2] = -0.5654 { 0.0019}

#50 O18(-2)[ 2] = -0.5574 { 0.0017}

#23 O9(-2)[ 2] = -0.5562 { 0.0017}

#41 O15(-2)[ 2] = -0.5425 { 0.0020}

#38 O14(-2)[ 2] = -0.5421 { 0.0019}

#68 O24(-2)[ 2] = -0.5417 { 0.0020}

#29 O11(-2)[ 2] = -0.5378 { 0.0020}

#65 O23(-2)[ 2] = -0.5374 { 0.0021}

#62 O22(-2)[ 2] = -0.5363 { 0.0021}

#20 O8(-2)[ 2] = -0.5315 { 0.0020}

#47 O17(-2)[ 2] = -0.5305 { 0.0021}

#46 C23(-3)[ 4] = -0.1619 { -0.0004}

#19 C5(-3)[ 4] = -0.1618 { -0.0005}

#37 C17(-3)[ 4] = -0.1599 { -0.0007}

#61 C33(-3)[ 4] = -0.1590 { -0.0007}

#31 C13(-3)[ 4] = -0.1585 { -0.0011}

#58 C31(-3)[ 4] = -0.1577 { -0.0007}

#22 C7(-3)[ 4] = -0.1571 { -0.0007}

#25 C9(-3)[ 4] = -0.1567 { -0.0009}

#28 C11(-3)[ 4] = -0.1564 { -0.0006}

#40 C19(-3)[ 4] = -0.1559 { -0.0009}

#52 C27(-3)[ 4] = -0.1559 { -0.0008}

#34 C15(-3)[ 4] = -0.1555 { -0.0009}

#49 C25(-3)[ 4] = -0.1554 { -0.0007}

#70 C39(-3)[ 4] = -0.1548 { -0.0008}

#43 C21(-3)[ 4] = -0.1535 { -0.0009}

#67 C37(-3)[ 4] = -0.1530 { -0.0007}

#64 C35(-3)[ 4] = -0.1503 { -0.0013}

#55 C29(-3)[ 4] = -0.1500 { -0.0011}

#14 C2(-2)[ 4] = -0.1108 { 0.0018}

#18 C4(-1)[ 4] = -0.0676 { 0.0022}

#45 C22(-1)[ 4] = -0.0660 { 0.0021}

#27 C10(-1)[ 4] = -0.0648 { 0.0021}

#60 C32(-1)[ 4] = -0.0601 { 0.0020}

#36 C16(-1)[ 4] = -0.0600 { 0.0021}

#54 C28(-1)[ 4] = -0.0555 { 0.0017}

#13 C1(-1)[ 4] = -0.0553 { 0.0020}

#15 C3(-1)[ 4] = -0.0547 { 0.0020}

#69 C38(-1)[ 4] = -0.0347 { 0.0023}

#42 C20(-1)[ 4] = -0.0332 { 0.0027}

#66 C36(-1)[ 4] = -0.0329 { 0.0026}

#39 C18(-1)[ 4] = -0.0318 { 0.0024}

#33 C14(-1)[ 4] = -0.0297 { 0.0026}

#63 C34(-1)[ 4] = -0.0292 { 0.0020}

#48 C24(-1)[ 4] = -0.0287 { 0.0024}

#51 C26(-1)[ 4] = -0.0277 { 0.0029}

#21 C6(-1)[ 4] = -0.0270 { 0.0025}

#24 C8(-1)[ 4] = -0.0249 { 0.0028}

#57 C30(-1)[ 4] = -0.0184 { 0.0027}

#30 C12(-1)[ 4] = -0.0096 { 0.0023}

#138 H68(+1)[ 1] = +0.0062 { 0.0066}

#93 H23(+1)[ 1] = +0.0066 { 0.0062}

#137 H67(+1)[ 1] = +0.0105 { 0.0071}

#148 H78(+1)[ 1] = +0.0115 { 0.0071}

#108 H38(+1)[ 1] = +0.0128 { 0.0072}

#103 H33(+1)[ 1] = +0.0139 { 0.0065}

#143 H73(+1)[ 1] = +0.0151 { 0.0065}

#82 H12(+1)[ 1] = +0.0157 { 0.0066}

#92 H22(+1)[ 1] = +0.0172 { 0.0062}

#127 H57(+1)[ 1] = +0.0185 { 0.0071}

#98 H28(+1)[ 1] = +0.0197 { 0.0065}

#77 H7(+1)[ 1] = +0.0203 { 0.0061}

#142 H72(+1)[ 1] = +0.0203 { 0.0064}

#118 H48(+1)[ 1] = +0.0204 { 0.0070}

#122 H52(+1)[ 1] = +0.0204 { 0.0062}

#158 H88(+1)[ 1] = +0.0210 { 0.0060}

#113 H43(+1)[ 1] = +0.0211 { 0.0066}

#78 H8(+1)[ 1] = +0.0220 { 0.0061}

#133 H63(+1)[ 1] = +0.0225 { 0.0061}

#132 H62(+1)[ 1] = +0.0226 { 0.0061}

#123 H53(+1)[ 1] = +0.0231 { 0.0064}

#152 H82(+1)[ 1] = +0.0234 { 0.0072}

#157 H87(+1)[ 1] = +0.0241 { 0.0065}

#163 H93(+1)[ 1] = +0.0243 { 0.0071}

#88 H18(+1)[ 1] = +0.0253 { 0.0064}

#97 H27(+1)[ 1] = +0.0259 { 0.0069}

#153 H83(+1)[ 1] = +0.0261 { 0.0069}

#102 H32(+1)[ 1] = +0.0267 { 0.0066}

#147 H77(+1)[ 1] = +0.0269 { 0.0064}

#128 H58(+1)[ 1] = +0.0270 { 0.0070}

#107 H37(+1)[ 1] = +0.0272 { 0.0069}

#71 H1(+1)[ 1] = +0.0275 { 0.0066}

#76 H6(+1)[ 1] = +0.0281 { 0.0071}

#112 H42(+1)[ 1] = +0.0287 { 0.0079}

#87 H17(+1)[ 1] = +0.0293 { 0.0064}

#117 H47(+1)[ 1] = +0.0305 { 0.0078}

#83 H13(+1)[ 1] = +0.0307 { 0.0066}

#162 H92(+1)[ 1] = +0.0323 { 0.0080}

#73 H3(+1)[ 1] = +0.0331 { 0.0072}

#72 H2(+1)[ 1] = +0.0332 { 0.0071}

#75 H5(+1)[ 1] = +0.0332 { 0.0072}

#125 H55(+1)[ 1] = +0.0389 { 0.0070}

#80 H10(+1)[ 1] = +0.0390 { 0.0070}

#141 H71(+1)[ 1] = +0.0406 { 0.0072}

#74 H4(+1)[ 1] = +0.0409 { 0.0079}

#110 H40(+1)[ 1] = +0.0414 { 0.0081}

#126 H56(+1)[ 1] = +0.0415 { 0.0070}

#151 H81(+1)[ 1] = +0.0415 { 0.0073}

#81 H11(+1)[ 1] = +0.0418 { 0.0073}

#111 H41(+1)[ 1] = +0.0423 { 0.0072}

#96 H26(+1)[ 1] = +0.0436 { 0.0074}

#154 H84(+1)[ 1] = +0.0458 { 0.0083}

#150 H80(+1)[ 1] = +0.0465 { 0.0076}

#129 H59(+1)[ 1] = +0.0470 { 0.0081}

#99 H29(+1)[ 1] = +0.0474 { 0.0081}

#119 H49(+1)[ 1] = +0.0478 { 0.0095}

#104 H34(+1)[ 1] = +0.0491 { 0.0078}

#139 H69(+1)[ 1] = +0.0492 { 0.0085}

#89 H19(+1)[ 1] = +0.0492 { 0.0091}

#114 H44(+1)[ 1] = +0.0492 { 0.0093}

#144 H74(+1)[ 1] = +0.0493 { 0.0078}

#140 H70(+1)[ 1] = +0.0494 { 0.0079}

#134 H64(+1)[ 1] = +0.0494 { 0.0086}

#159 H89(+1)[ 1] = +0.0495 { 0.0077}

#164 H94(+1)[ 1] = +0.0496 { 0.0091}

#84 H14(+1)[ 1] = +0.0507 { 0.0086}

#149 H79(+1)[ 1] = +0.0509 { 0.0086}

#109 H39(+1)[ 1] = +0.0521 { 0.0085}

#94 H24(+1)[ 1] = +0.0522 { 0.0080}

#95 H25(+1)[ 1] = +0.0524 { 0.0079}

#79 H9(+1)[ 1] = +0.0531 { 0.0078}

#124 H54(+1)[ 1] = +0.0542 { 0.0077}

#91 H21(+1)[ 1] = +0.0560 { 0.0085}

#90 H20(+1)[ 1] = +0.0564 { 0.0084}

#146 H76(+1)[ 1] = +0.0569 { 0.0086}

#116 H46(+1)[ 1] = +0.0569 { 0.0082}

#166 H96(+1)[ 1] = +0.0573 { 0.0079}

#106 H36(+1)[ 1] = +0.0575 { 0.0081}

#101 H31(+1)[ 1] = +0.0576 { 0.0078}

#135 H65(+1)[ 1] = +0.0576 { 0.0084}

#136 H66(+1)[ 1] = +0.0580 { 0.0081}

#85 H15(+1)[ 1] = +0.0581 { 0.0079}

#121 H51(+1)[ 1] = +0.0581 { 0.0082}

#130 H60(+1)[ 1] = +0.0582 { 0.0085}

#155 H85(+1)[ 1] = +0.0585 { 0.0078}

#131 H61(+1)[ 1] = +0.0594 { 0.0083}

#145 H75(+1)[ 1] = +0.0594 { 0.0086}

#115 H45(+1)[ 1] = +0.0596 { 0.0090}

#120 H50(+1)[ 1] = +0.0598 { 0.0086}

#165 H95(+1)[ 1] = +0.0604 { 0.0084}

#105 H35(+1)[ 1] = +0.0607 { 0.0086}

#160 H90(+1)[ 1] = +0.0609 { 0.0078}

#100 H30(+1)[ 1] = +0.0616 { 0.0078}

#86 H16(+1)[ 1] = +0.0620 { 0.0082}

#161 H91(+1)[ 1] = +0.0620 { 0.0079}

#156 H86(+1)[ 1] = +0.0624 { 0.0077}

#1 Ti1(+4)[ 6] = +1.5293 { 0.0233}

#7 Ti7(+4)[ 6] = +2.2103 { 0.0343}

#5 Ti5(+4)[ 6] = +2.2141 { 0.0342}

#2 Ti2(+4)[ 6] = +2.2141 { 0.0336}

#4 Ti4(+4)[ 6] = +2.2286 { 0.0346}

#3 Ti3(+4)[ 6] = +2.3377 { 0.0349}

#6 Ti6(+4)[ 6] = +2.3514 { 0.0349}

Partial electrostatic balance: <EB> = -449.180 eV = -43338.9 kJ.mol-1

Reduced electrostatic balance: <EB/2> = -224.590 eV = -21669.4 kJ.mol-1

Global ionicity: <GI> = 25.343 %

Statistical report: <Atom>[num] = mean ± 3×stdev (stdev) <avdev>

<q(H)>[96] = 0.0395 ± 0.0489 (0.0163) <0.0145>

<f(H)>[96] = 0.0075 ± 0.0026 (0.0009) <0.0007>

<q(C)>[39] = -0.0958 ± 0.1777 (0.0592) <0.0566>

<f(C)>[39] = 0.0009 ± 0.0048 (0.0016) <0.0015>

<q(O)>[24] = -0.6310 ± 0.3563 (0.1188) <0.0910>

<f(O)>[24] = 0.0006 ± 0.0051 (0.0017) <0.0014>

<q(Ti)>[7] = 2.1551 ± 0.8476 (0.2825) <0.1788>

<f(Ti)>[7] = 0.0328 ± 0.0127 (0.0042) <0.0027>

WinPacha atomic charges calculations report for 181

(µ4-2,2-bis(hydroxymethyl)-1,3-propanediolato(O,O,O',O',O'',O'''))-tetrakis(µ2-ethoxo)-

Fivefold coordination in titanium alkoxide chemistry.

A new tentacular pentaerythritol-based tetramer.

Biechel, Frédérique; Henry, Marc

V= 2178.59 Å³ (Z = 2) -> Rval = 5.30% T = 173K

***Atomic electronegativies (eV) and radii (pm) ***

Ti( 8.170, 147.7)

O( 21.360, 45.0)

C( 15.050, 62.0)

H( 13.610, 53.0)

Madelung summation with gaussian inner-charge scaling (G = 0.15 Å-1)

Reciprocal space exploration: -2 <= (h, k, l) <= 2

Madelung constant A = 301.9314097/2 = 150.9657049 (dmin = 0.949 Å )

min = -0.29231 Å-1 < mean = 0.24378 Å-1 < max = 2.22438 Å-1

Total electrostatic balance = -4582.85 eV = -442174.2 kJ.mol-1

Mean electronegativity: <EN> = 12.60 eV

Global hardness: <GH> = 1.95 eV (G = 0.15 Å-1)

Electronic signature: #n Label(±ox)[CN] = ±q {±f}

Atom Charge Fukui

#26 O9(-2)[ 3] = -0.683 { -0.001}

#47 O16(-2)[ 3] = -0.682 { -0.001}

#17 O5(-2)[ 3] = -0.678 { -0.001}

#15 O4(-2)[ 3] = -0.670 { -0.001}

#35 O12(-2)[ 3] = -0.670 { -0.001}

#38 O13(-2)[ 3] = -0.668 { -0.001}

#23 O8(-2)[ 2] = -0.597 { 0.002}

#5 O1(-2)[ 2] = -0.588 { 0.002}

#20 O7(-2)[ 2] = -0.569 { 0.003}

#8 O2(-2)[ 2] = -0.567 { 0.003}

#29 O10(-2)[ 2] = -0.567 { 0.003}

#11 O3(-2)[ 2] = -0.563 { 0.002}

#19 O6(-2)[ 2] = -0.563 { 0.002}

#32 O11(-2)[ 2] = -0.561 { 0.003}

#44 O15(-2)[ 2] = -0.559 { 0.003}

#41 O14(-2)[ 2] = -0.558 { 0.002}

#28 C15(-3)[ 4] = -0.161 { -0.001}

#37 C21(-3)[ 4] = -0.161 { -0.000}

#49 C29(-3)[ 4] = -0.159 { -0.001}

#31 C17(-3)[ 4] = -0.158 { -0.001}

#10 C4(-3)[ 4] = -0.158 { -0.001}

#43 C25(-3)[ 4] = -0.158 { -0.001}

#46 C27(-3)[ 4] = -0.157 { -0.001}

#34 C19(-3)[ 4] = -0.156 { -0.002}

#25 C13(-3)[ 4] = -0.156 { -0.002}

#22 C11(-3)[ 4] = -0.154 { -0.001}

#7 C2(-3)[ 4] = -0.154 { -0.001}

#40 C23(-3)[ 4] = -0.152 { -0.001}

#48 C28(-1)[ 4] = -0.076 { 0.003}

#27 C14(-1)[ 4] = -0.073 { 0.003}

#39 C22(-1)[ 4] = -0.070 { 0.003}

#36 C20(-1)[ 4] = -0.069 { 0.003}

#14 C7(-1)[ 4] = -0.065 { 0.002}

#16 C8(-1)[ 4] = -0.064 { 0.002}

#13 C6(+0)[ 4] = -0.060 { 0.007}

#21 C10(-1)[ 4] = -0.050 { 0.004}

#18 C9(-1)[ 4] = -0.048 { 0.002}

#12 C5(-1)[ 4] = -0.047 { 0.003}

#9 C3(-1)[ 4] = -0.043 { 0.004}

#42 C24(-1)[ 4] = -0.034 { 0.004}

#6 C1(-1)[ 4] = -0.031 { 0.004}

#24 C12(-1)[ 4] = -0.031 { 0.004}

#45 C26(-1)[ 4] = -0.030 { 0.004}

#33 C18(-1)[ 4] = -0.026 { 0.004}

#30 C16(-1)[ 4] = -0.025 { 0.003}

#65 H16(+1)[ 1] = -0.021 { 0.007}

#63 H14(+1)[ 1] = -0.021 { 0.007}

#88 H39(+1)[ 1] = -0.013 { 0.009}

#103 H54(+1)[ 1] = +0.003 { 0.008}

#94 H45(+1)[ 1] = +0.004 { 0.009}

#99 H50(+1)[ 1] = +0.007 { 0.009}

#74 H25(+1)[ 1] = +0.012 { 0.010}

#98 H49(+1)[ 1] = +0.013 { 0.009}

#101 H52(+1)[ 1] = +0.013 { 0.010}

#69 H20(+1)[ 1] = +0.016 { 0.009}

#62 H13(+1)[ 1] = +0.016 { 0.009}

#50 H1(+1)[ 1] = +0.017 { 0.010}

#64 H15(+1)[ 1] = +0.018 { 0.009}

#56 H7(+1)[ 1] = +0.018 { 0.009}

#79 H30(+1)[ 1] = +0.018 { 0.010}

#84 H35(+1)[ 1] = +0.019 { 0.010}

#51 H2(+1)[ 1] = +0.020 { 0.009}

#108 H59(+1)[ 1] = +0.021 { 0.009}

#93 H44(+1)[ 1] = +0.021 { 0.009}

#117 H68(+1)[ 1] = +0.022 { 0.010}

#114 H65(+1)[ 1] = +0.026 { 0.009}

#78 H29(+1)[ 1] = +0.026 { 0.010}

#113 H64(+1)[ 1] = +0.028 { 0.009}

#109 H60(+1)[ 1] = +0.029 { 0.010}

#72 H23(+1)[ 1] = +0.029 { 0.010}

#73 H24(+1)[ 1] = +0.030 { 0.010}

#96 H47(+1)[ 1] = +0.030 { 0.009}

#89 H40(+1)[ 1] = +0.031 { 0.010}

#82 H33(+1)[ 1] = +0.035 { 0.011}

#83 H34(+1)[ 1] = +0.036 { 0.012}

#116 H67(+1)[ 1] = +0.036 { 0.010}

#66 H17(+1)[ 1] = +0.036 { 0.009}

#81 H32(+1)[ 1] = +0.037 { 0.011}

#97 H48(+1)[ 1] = +0.039 { 0.011}

#60 H11(+1)[ 1] = +0.039 { 0.009}

#59 H10(+1)[ 1] = +0.039 { 0.011}

#104 H55(+1)[ 1] = +0.040 { 0.010}

#102 H53(+1)[ 1] = +0.041 { 0.011}

#106 H57(+1)[ 1] = +0.041 { 0.010}

#67 H18(+1)[ 1] = +0.044 { 0.009}

#55 H6(+1)[ 1] = +0.045 { 0.011}

#68 H19(+1)[ 1] = +0.045 { 0.011}

#115 H66(+1)[ 1] = +0.045 { 0.011}

#52 H3(+1)[ 1] = +0.045 { 0.012}

#95 H46(+1)[ 1] = +0.046 { 0.010}

#105 H56(+1)[ 1] = +0.046 { 0.011}

#110 H61(+1)[ 1] = +0.048 { 0.012}

#90 H41(+1)[ 1] = +0.048 { 0.013}

#70 H21(+1)[ 1] = +0.049 { 0.011}

#77 H28(+1)[ 1] = +0.049 { 0.013}

#85 H36(+1)[ 1] = +0.050 { 0.012}

#61 H12(+1)[ 1] = +0.051 { 0.009}

#91 H42(+1)[ 1] = +0.051 { 0.013}

#80 H31(+1)[ 1] = +0.052 { 0.013}

#100 H51(+1)[ 1] = +0.052 { 0.012}

#87 H38(+1)[ 1] = +0.052 { 0.011}

#57 H8(+1)[ 1] = +0.052 { 0.012}

#71 H22(+1)[ 1] = +0.053 { 0.011}

#75 H26(+1)[ 1] = +0.054 { 0.012}

#53 H4(+1)[ 1] = +0.056 { 0.011}

#58 H9(+1)[ 1] = +0.056 { 0.012}

#111 H62(+1)[ 1] = +0.056 { 0.011}

#86 H37(+1)[ 1] = +0.057 { 0.012}

#76 H27(+1)[ 1] = +0.057 { 0.013}

#112 H63(+1)[ 1] = +0.059 { 0.012}

#54 H5(+1)[ 1] = +0.059 { 0.011}

#92 H43(+1)[ 1] = +0.060 { 0.013}

#107 H58(+1)[ 1] = +0.062 { 0.011}

#4 Ti4(+4)[ 6] = +2.457 { 0.051}

#3 Ti3(+4)[ 6] = +2.474 { 0.053}

#1 Ti1(+4)[ 5] = +2.581 { 0.061}

#2 Ti2(+4)[ 5] = +2.601 { 0.061}

Partial electrostatic balance: <EB> = -317.09 eV = -30594.6 kJ.mol-1

Reduced electrostatic balance: <EB/2> = -158.55 eV = -15297.3 kJ.mol-1

Global ionicity: <GI> = 26.30 %

Statistical report: <Atom>[num] = mean ± 3×stdev (stdev) <avdev>

<q(H)>[68] = 0.035 ± 0.058 (0.019) <0.016>

<f(H)>[68] = 0.010 ± 0.004 (0.001) <0.001>

<q(C)>[29] = -0.094 ± 0.167 (0.056) <0.052>

<f(C)>[29] = 0.002 ± 0.007 (0.002) <0.002>

<q(O)>[16] = -0.609 ± 0.162 (0.054) <0.050>

<f(O)>[16] = 0.001 ± 0.005 (0.002) <0.002>

<q(Ti)>[4] = 2.528 ± 0.219 (0.073) <0.063>

<f(Ti)>[4] = 0.056 ± 0.016 (0.005) <0.005>

WinPacha atomic charges calculations report for NAYZAO

V= 2424.29 Å³ (Z = 1) -> No R-value

***Atomic electronegativies (eV) and radii (pm) ***

Ti( 8.170, 147.7)

O( 21.360, 45.0)

C( 15.050, 62.0)

H( 13.610, 53.0)

Madelung summation with gaussian inner-charge scaling (G = 0.14 Å-1)

Reciprocal space exploration: -2 <= (h, k, l) <= 2

Madelung constant A = 198.6805745/1 = 198.6805745 (dmin = 0.950 Å )

min = -0.12349 Å-1 < mean = 0.10592 Å-1 < max = 0.93014 Å-1

Total electrostatic balance = -3010.19 eV = -290436.1 kJ.mol-1

Mean electronegativity: <EN> = 13.30 eV

Global hardness: <GH> = 1.60 eV (G = 0.00 Å-1)

Electronic signature: #n Label(±ox)[CN] = ±q {±f}

Atom Charge Fukui

#3 O1(-2)[ 3] = -0.677 { -0.000}

#4 O2(-2)[ 3] = -0.676 { -0.000}

#8 O6(-2)[ 2] = -0.581 { 0.001}

#10 O8(-2)[ 2] = -0.580 { 0.002}

#5 O3(-2)[ 2] = -0.578 { 0.001}

#7 O5(-2)[ 2] = -0.577 { 0.002}

#9 O7(-2)[ 2] = -0.564 { 0.001}

#6 O4(-2)[ 2] = -0.561 { 0.001}

#39 C29(-3)[ 4] = -0.156 { -0.007}

#49 C39(-3)[ 4] = -0.156 { -0.005}

#34 C24(-3)[ 4] = -0.156 { -0.004}

#28 C18(-3)[ 4] = -0.155 { -0.004}

#24 C14(-3)[ 4] = -0.155 { -0.007}

#43 C33(-3)[ 4] = -0.155 { -0.004}

#19 C9(-3)[ 4] = -0.154 { -0.002}

#15 C5(-3)[ 4] = -0.154 { -0.003}

#23 C13(-3)[ 4] = -0.152 { -0.001}

#40 C30(-3)[ 4] = -0.152 { -0.004}

#30 C20(-3)[ 4] = -0.151 { -0.002}

#25 C15(-3)[ 4] = -0.151 { -0.004}

#38 C28(-3)[ 4] = -0.151 { -0.001}

#45 C35(-3)[ 4] = -0.151 { -0.002}

#33 C23(-3)[ 4] = -0.151 { -0.005}

#35 C25(-3)[ 4] = -0.151 { -0.001}

#29 C19(-3)[ 4] = -0.150 { -0.005}

#20 C10(-3)[ 4] = -0.150 { -0.005}

#50 C40(-3)[ 4] = -0.150 { -0.003}

#44 C34(-3)[ 4] = -0.150 { -0.005}

#48 C38(-3)[ 4] = -0.150 { -0.001}

#18 C8(-3)[ 4] = -0.150 { -0.003}

#14 C4(-3)[ 4] = -0.149 { -0.006}

#13 C3(-3)[ 4] = -0.149 { -0.003}

#11 C1(-1)[ 4] = -0.065 { 0.001}

#16 C6(-1)[ 4] = -0.064 { 0.001}

#31 C21(-1)[ 4] = -0.036 { -0.000}

#26 C16(-1)[ 4] = -0.033 { 0.001}

#41 C31(-1)[ 4] = -0.031 { 0.001}

#21 C11(-1)[ 4] = -0.029 { 0.000}

#46 C36(-1)[ 4] = -0.028 { -0.001}

#36 C26(-1)[ 4] = -0.026 { 0.000}

#12 C2(+0)[ 4] = -0.021 { 0.006}

#17 C7(+0)[ 4] = -0.020 { 0.006}

#73 H23(+1)[ 1] = -0.012 { 0.004}

#47 C37(+0)[ 4] = -0.011 { 0.006}

#32 C22(+0)[ 4] = -0.009 { 0.006}

#42 C32(+0)[ 4] = -0.009 { 0.006}

#27 C17(+0)[ 4] = -0.007 { 0.006}

#106 H56(+1)[ 1] = -0.006 { 0.005}

#37 C27(+0)[ 4] = -0.006 { 0.006}

#22 C12(+0)[ 4] = -0.004 { 0.006}

#74 H24(+1)[ 1] = +0.007 { 0.009}

#64 H14(+1)[ 1] = +0.008 { 0.009}

#55 H5(+1)[ 1] = +0.009 { 0.009}

#118 H68(+1)[ 1] = +0.009 { 0.005}

#52 H2(+1)[ 1] = +0.010 { 0.004}

#63 H13(+1)[ 1] = +0.010 { 0.004}

#85 H35(+1)[ 1] = +0.010 { 0.005}

#107 H57(+1)[ 1] = +0.013 { 0.010}

#95 H45(+1)[ 1] = +0.014 { 0.005}

#128 H78(+1)[ 1] = +0.015 { 0.007}

#58 H8(+1)[ 1] = +0.022 { 0.013}

#62 H12(+1)[ 1] = +0.024 { 0.004}

#51 H1(+1)[ 1] = +0.025 { 0.004}

#70 H20(+1)[ 1] = +0.025 { 0.014}

#84 H34(+1)[ 1] = +0.032 { 0.005}

#131 H81(+1)[ 1] = +0.035 { 0.005}

#117 H67(+1)[ 1] = +0.036 { 0.005}

#124 H74(+1)[ 1] = +0.036 { 0.009}

#129 H79(+1)[ 1] = +0.037 { 0.016}

#96 H46(+1)[ 1] = +0.038 { 0.014}

#104 H54(+1)[ 1] = +0.039 { 0.005}

#90 H40(+1)[ 1] = +0.041 { 0.009}

#105 H55(+1)[ 1] = +0.045 { 0.005}

#132 H82(+1)[ 1] = +0.046 { 0.005}

#65 H15(+1)[ 1] = +0.048 { 0.006}

#57 H7(+1)[ 1] = +0.048 { 0.013}

#123 H73(+1)[ 1] = +0.048 { 0.015}

#89 H39(+1)[ 1] = +0.049 { 0.016}

#53 H3(+1)[ 1] = +0.049 { 0.007}

#72 H22(+1)[ 1] = +0.050 { 0.013}

#136 H86(+1)[ 1] = +0.050 { 0.008}

#79 H29(+1)[ 1] = +0.050 { 0.023}

#56 H6(+1)[ 1] = +0.050 { 0.025}

#120 H70(+1)[ 1] = +0.051 { 0.007}

#101 H51(+1)[ 1] = +0.051 { 0.008}

#91 H41(+1)[ 1] = +0.051 { 0.021}

#122 H72(+1)[ 1] = +0.051 { 0.020}

#60 H10(+1)[ 1] = +0.051 { 0.009}

#125 H75(+1)[ 1] = +0.051 { 0.010}

#71 H21(+1)[ 1] = +0.051 { 0.024}

#97 H47(+1)[ 1] = +0.051 { 0.013}

#121 H71(+1)[ 1] = +0.051 { 0.013}

#111 H61(+1)[ 1] = +0.051 { 0.024}

#54 H4(+1)[ 1] = +0.051 { 0.019}

#82 H32(+1)[ 1] = +0.051 { 0.015}

#88 H38(+1)[ 1] = +0.051 { 0.008}

#116 H66(+1)[ 1] = +0.051 { 0.015}

#86 H36(+1)[ 1] = +0.051 { 0.015}

#92 H42(+1)[ 1] = +0.051 { 0.010}

#102 H52(+1)[ 1] = +0.051 { 0.020}

#68 H18(+1)[ 1] = +0.051 { 0.008}

#78 H28(+1)[ 1] = +0.051 { 0.013}

#135 H85(+1)[ 1] = +0.051 { 0.023}

#66 H16(+1)[ 1] = +0.051 { 0.016}

#113 H63(+1)[ 1] = +0.051 { 0.014}

#134 H84(+1)[ 1] = +0.052 { 0.012}

#103 H53(+1)[ 1] = +0.052 { 0.006}

#109 H59(+1)[ 1] = +0.052 { 0.006}

#130 H80(+1)[ 1] = +0.052 { 0.006}

#80 H30(+1)[ 1] = +0.052 { 0.021}

#108 H58(+1)[ 1] = +0.052 { 0.005}

#110 H60(+1)[ 1] = +0.052 { 0.007}

#75 H25(+1)[ 1] = +0.052 { 0.006}

#112 H62(+1)[ 1] = +0.052 { 0.021}

#76 H26(+1)[ 1] = +0.052 { 0.007}

#87 H37(+1)[ 1] = +0.052 { 0.018}

#61 H11(+1)[ 1] = +0.052 { 0.017}

#119 H69(+1)[ 1] = +0.052 { 0.016}

#114 H64(+1)[ 1] = +0.052 { 0.019}

#83 H33(+1)[ 1] = +0.052 { 0.018}

#100 H50(+1)[ 1] = +0.052 { 0.012}

#133 H83(+1)[ 1] = +0.052 { 0.013}

#67 H17(+1)[ 1] = +0.052 { 0.006}

#69 H19(+1)[ 1] = +0.053 { 0.014}

#59 H9(+1)[ 1] = +0.053 { 0.007}

#138 H88(+1)[ 1] = +0.053 { 0.006}

#137 H87(+1)[ 1] = +0.053 { 0.016}

#98 H48(+1)[ 1] = +0.053 { 0.021}

#94 H44(+1)[ 1] = +0.055 { 0.006}

#77 H27(+1)[ 1] = +0.055 { 0.005}

#127 H77(+1)[ 1] = +0.055 { 0.006}

#99 H49(+1)[ 1] = +0.056 { 0.009}

#115 H65(+1)[ 1] = +0.056 { 0.008}

#81 H31(+1)[ 1] = +0.057 { 0.008}

#126 H76(+1)[ 1] = +0.059 { 0.006}

#93 H43(+1)[ 1] = +0.060 { 0.006}

#1 Ti1(+4)[ 5] = +2.525 { 0.029}

#2 Ti2(+4)[ 5] = +2.528 { 0.028}

Partial electrostatic balance: <EB> = -82.38 eV = -7948.1 kJ.mol-1

Reduced electrostatic balance: <EB/1> = -82.38 eV = -7948.1 kJ.mol-1

Global ionicity: <GI> = 16.54 %

Statistical report: <Atom>[num] = mean ± 3×stdev (stdev) <avdev>

<q(H)>[88] = 0.043 ± 0.049 (0.016) <0.013>

<f(H)>[88] = 0.011 ± 0.018 (0.006) <0.005>

<q(C)>[40] = -0.101 ± 0.192 (0.064) <0.061>

<f(C)>[40] = -0.001 ± 0.012 (0.004) <0.003>

<q(O)>[8] = -0.599 ± 0.145 (0.048) <0.039>

<f(O)>[8] = 0.001 ± 0.003 (0.001) <0.001>

<q(Ti)>[2] = 2.527 ± 0.006 (0.002) <0.001>

<f(Ti)>[2] = 0.028 ± 0.000 (0.000) <0.000>

WinPacha downhill simplex report for ZELDEZ

[Ti5(OPri)9(µ-O2C2H4)3(µ3-O2C2H4)]

Metal-assisted activation of the C-O bond of 2-hydroxyethylmethacryslate.

Synthesis and molecular structure of [Ti5(OPri)9(µ-O2C2H4)3(µ3-O2C2H4)].

Chem.Commun., , 1817,1995

N.Pajot,R.Papiernik,L.G.Hubert-Pfalzgraf,J.Vaissermann,S.Parraud

V= 2856.02 Å³ (Z = 2) -> Rval = 7.50% T = 173K

Initial function value is 101321

Number of function evaluations: 368

Vertices of final 20-d simplex and

function values at the vertices:

i 1 2 3 4 5 6 7 function

1 -63.517776 -65.927963 -62.631058 -45.981926 -70.016785 -57.920776 -142.659546 100330

2 -63.527607 -66.013397 -62.617767 -46.038532 -70.041206 -57.939922 -142.531631 100330

3 -63.538681 -66.306656 -62.624462 -46.110638 -70.053314 -57.870262 -142.531815 100330

4 -63.523106 -65.902855 -62.629971 -46.023804 -70.022110 -57.926655 -142.635086 100330

5 -63.524426 -65.826370 -62.650261 -46.030975 -69.992538 -57.917580 -142.705902 100330

6 -63.514755 -65.881905 -62.630131 -46.000031 -69.908386 -57.892365 -142.675781 100330

7 -63.515587 -65.881172 -62.641037 -46.018562 -70.028122 -58.027985 -142.692810 100330

8 -63.514778 -65.855225 -62.634571 -46.004791 -70.019897 -57.941338 -142.620392 100330

9 -63.522697 -65.940804 -62.617855 -46.022854 -69.985283 -57.933136 -142.696274 100330

10 -63.522594 -65.831848 -62.640755 -46.020626 -70.015244 -57.927715 -142.666260 100330

11 -63.525780 -65.916969 -62.616249 -46.008339 -69.996765 -57.920090 -142.662842 100330

12 -63.521294 -65.882477 -62.634621 -46.015404 -70.005913 -57.952812 -142.645905 100330

13 -63.525902 -66.097397 -62.603497 -46.092606 -70.014839 -57.879272 -142.589172 100330

14 -63.522820 -65.828537 -62.641769 -46.010986 -70.027557 -57.919827 -142.689331 100330

15 -63.523712 -65.878876 -62.612461 -46.039886 -69.998291 -57.950958 -142.680115 100330

16 -63.523697 -65.880318 -62.619118 -46.026367 -70.025513 -57.926334 -142.669449 100330

17 -63.521065 -65.865913 -62.635223 -46.021660 -70.033447 -57.928696 -142.674957 100330

18 -63.517384 -65.819382 -62.592171 -46.076050 -70.093224 -57.939468 -142.658051 100330

19 -63.528423 -66.027786 -62.646954 -46.043488 -69.999062 -57.934505 -142.589828 100330

20 -63.511398 -65.884743 -62.618237 -45.984722 -70.027397 -57.955971 -142.648132 100330

21 -63.521278 -66.030296 -62.634350 -46.060310 -70.022087 -57.937962 -142.555130 100330

i 8 9 10 11 12 13 14 function

1 -53.621628 -63.092087 -55.351181 -58.216301 -56.060753 -55.571823 -64.745728 100330

2 -53.601154 -63.027271 -55.310879 -58.238808 -56.106396 -55.576145 -64.749565 100330

3 -53.490795 -62.935936 -55.108818 -58.213428 -56.127445 -55.503876 -64.664436 100330

4 -53.626045 -63.054108 -55.322186 -58.223763 -56.100594 -55.577385 -64.719055 100330

5 -53.619232 -63.071690 -55.365784 -58.228935 -56.067398 -55.551208 -64.765564 100330

6 -53.634277 -63.087791 -55.397499 -58.243317 -56.071800 -55.613865 -64.751297 100330

7 -53.625313 -63.047958 -55.385838 -58.155472 -56.043251 -55.621578 -64.677887 100330

8 -53.662651 -63.103771 -55.377705 -58.211735 -56.063614 -55.578239 -64.719452 100330

9 -53.498150 -63.053558 -55.322159 -58.222488 -56.102055 -55.537682 -64.784653 100330

10 -53.616573 -63.127747 -55.327225 -58.207302 -56.092850 -55.580833 -64.717407 100330

11 -53.641846 -63.079552 -55.283131 -58.193932 -56.106255 -55.579365 -64.724121 100330

12 -53.627419 -63.084667 -55.298981 -58.272827 -56.090263 -55.565567 -64.699860 100330

13 -53.533638 -63.097599 -55.277462 -58.216423 -56.018261 -55.596912 -64.718262 100330

14 -53.626213 -63.064789 -55.321564 -58.227699 -56.090462 -55.597839 -64.718781 100330

15 -53.593365 -63.097923 -55.282810 -58.182777 -56.075600 -55.593163 -64.814911 100330

16 -53.617737 -63.064110 -55.309605 -58.222122 -56.094566 -55.573517 -64.708344 100330

17 -53.621178 -63.069340 -55.315670 -58.216171 -56.092857 -55.568169 -64.711441 100330

18 -53.598717 -63.098194 -55.319237 -58.278473 -56.106186 -55.611977 -64.739883 100330

19 -53.588615 -63.019665 -55.322323 -58.205547 -56.094372 -55.596962 -64.722214 100330

20 -53.627754 -63.086143 -55.327267 -58.223598 -56.082581 -55.563049 -64.732620 100330

21 -53.593712 -63.040508 -55.326145 -58.215492 -56.081379 -55.606133 -64.745361 100330

i 15 16 17 18 19 20 function

1 -76.763321 -57.483406 -141.329956 -59.944862 -80.348160 -92.261215 100330

2 -76.819138 -57.468510 -141.314896 -59.915787 -80.308861 -92.298119 100330

3 -77.113197 -57.374985 -141.295380 -59.968082 -80.387093 -92.295792 100330

4 -76.805084 -57.479607 -141.333527 -59.929665 -80.333107 -92.267120 100330

5 -76.748566 -57.487030 -141.346237 -59.929565 -80.331512 -92.215431 100330

6 -76.743378 -57.465668 -141.326050 -59.913673 -80.362671 -92.250008 100330

7 -76.791046 -57.454006 -141.353058 -59.873055 -80.346375 -92.219208 100330

8 -76.798111 -57.476257 -141.317932 -59.893051 -80.368622 -92.204567 100330

9 -76.843758 -57.504711 -141.326263 -59.936069 -80.324539 -92.241333 100330

10 -76.795891 -57.467247 -141.346039 -59.915817 -80.339401 -92.250031 100330

11 -76.817215 -57.511242 -141.323639 -59.957092 -80.314377 -92.259872 100330

12 -76.810150 -57.465233 -141.338867 -59.911247 -80.343971 -92.250259 100330

13 -76.884850 -57.472546 -141.280685 -59.989674 -80.309013 -92.301865 100330

14 -76.800232 -57.483860 -141.331970 -59.922737 -80.329948 -92.254288 100330

15 -76.775154 -57.448944 -141.345886 -59.920013 -80.383026 -92.232918 100330

16 -76.807938 -57.479897 -141.338074 -59.933678 -80.343140 -92.266373 100330

17 -76.804779 -57.489769 -141.329895 -59.902466 -80.341949 -92.267540 100330

18 -76.798172 -57.453037 -141.253998 -59.912979 -80.342758 -92.252197 100330

19 -76.817101 -57.444317 -141.289688 -59.934944 -80.355827 -92.252769 100330

20 -76.795158 -57.436241 -141.327118 -59.932697 -80.340317 -92.271790 100330

21 -76.840538 -57.417091 -141.334702 -59.891632 -80.350533 -92.223526 100330

WinPacha atomic charges calculations report for ZELDEZ

[Ti5(OPri)9(µ-O2C2H4)3(µ3-O2C2H4)]

Metal-assisted activation of the C-O bond of 2-hydroxyethylmethacryslate.

Synthesis and molecular structure of [Ti5(OPri)9(µ-O2C2H4)3(µ3-O2C2H4)].

Chem.Commun., , 1817,1995

N.Pajot,R.Papiernik,L.G.Hubert-Pfalzgraf,J.Vaissermann,S.Parraud

V= 2856.02 Å³ (Z = 2) -> Rval = 7.50% T = 173K

***Atomic electronegativies (eV) and radii (pm) ***

Ti( 8.170, 147.7)

O( 21.360, 45.0)

C( 15.050, 62.0)

H( 13.610, 53.0)

Madelung summation with gaussian inner-charge scaling (G = 0.14 Å-1)

Reciprocal space exploration: -2 <= (h, k, l) <= 2

Madelung constant A = 431.7390795/2 = 215.8695398 (dmin = 1.070 Å )

min = -0.27985 Å-1 < mean = 0.21265 Å-1 < max = 1.98459 Å-1

Total electrostatic balance = -5810.44 eV = -560617.3 kJ.mol-1

Mean electronegativity: <EN> = 12.79 eV

Global hardness: <GH> = 1.69 eV (G = 0.14 Å-1)

Electronic signature: #n Label(±ox)[CN] = ±q {±f}

Atom Charge Fukui

#15 O10(-2)[ 4] = -0.702 { -0.001}

#8 O3(-2)[ 3] = -0.698 { -0.001}

#17 O12(-2)[ 3] = -0.686 { -0.001}

#11 O6(-2)[ 3] = -0.671 { -0.000}

#9 O4(-2)[ 3] = -0.671 { -0.001}

#6 O1(-2)[ 3] = -0.658 { -0.000}

#12 O7(-2)[ 3] = -0.657 { -0.000}

#10 O5(-2)[ 3] = -0.643 { -0.000}

#13 O8(-2)[ 3] = -0.628 { 0.000}

#24 O19(-2)[ 2] = -0.627 { 0.000}

#23 O18(-2)[ 2] = -0.608 { 0.001}

#25 O20(-2)[ 2] = -0.603 { 0.001}

#18 O13(-2)[ 2] = -0.585 { 0.001}

#19 O14(-2)[ 2] = -0.576 { 0.001}

#16 O11(-2)[ 2] = -0.572 { 0.002}

#21 O16(-2)[ 2] = -0.564 { 0.001}

#20 O15(-2)[ 2] = -0.553 { 0.001}

#22 O17(-2)[ 2] = -0.545 { 0.002}

#14 O9(-2)[ 2] = -0.534 { 0.003}

#7 O2(-2)[ 2] = -0.534 { 0.002}

#52 C27(-3)[ 4] = -0.124 { 0.002}

#48 C23(-3)[ 4] = -0.124 { 0.002}

#51 C26(-3)[ 4] = -0.121 { 0.002}

#49 C24(-3)[ 4] = -0.121 { 0.002}

#60 C35(-3)[ 4] = -0.119 { 0.002}

#55 C30(-3)[ 4] = -0.118 { 0.002}

#63 C38(-3)[ 4] = -0.117 { 0.002}

#56 C31(-3)[ 4] = -0.117 { 0.002}

#46 C21(-3)[ 4] = -0.116 { 0.002}

#62 C37(-3)[ 4] = -0.116 { 0.002}

#53 C28(-3)[ 4] = -0.116 { 0.002}

#65 C40(-3)[ 4] = -0.114 { 0.002}

#59 C34(-3)[ 4] = -0.114 { 0.002}

#57 C32(-3)[ 4] = -0.114 { 0.002}

#47 C22(-3)[ 4] = -0.113 { 0.002}

#58 C33(-3)[ 4] = -0.112 { 0.002}

#54 C29(-3)[ 4] = -0.111 { 0.003}

#50 C25(-3)[ 4] = -0.111 { 0.002}

#61 C36(-3)[ 4] = -0.110 { 0.002}

#64 C39(-3)[ 4] = -0.107 { 0.002}

#35 C10(-1)[ 4] = -0.093 { 0.002}

#26 C1(-1)[ 4] = -0.090 { 0.003}

#28 C3(-1)[ 4] = -0.075 { 0.003}

#29 C4(-1)[ 4] = -0.070 { 0.003}

#30 C5(-1)[ 4] = -0.063 { 0.003}

#32 C7(-1)[ 4] = -0.062 { 0.003}

#33 C8(-1)[ 4] = -0.061 { 0.003}

#31 C6(-1)[ 4] = -0.054 { 0.003}

#34 C9(-1)[ 4] = -0.046 { 0.003}

#27 C2(-1)[ 4] = -0.044 { 0.003}

#37 C12(+0)[ 4] = -0.033 { 0.004}

#83 H83(+1)[ 1] = -0.009 { 0.008}

#66 H66(+1)[ 1] = -0.008 { 0.006}

#81 H81(+1)[ 1] = -0.006 { 0.005}

#82 H82(+1)[ 1] = -0.004 { 0.006}

#76 H76(+1)[ 1] = -0.003 { 0.006}

#88 H88(+1)[ 1] = -0.001 { 0.006}

#72 H72(+1)[ 1] = +0.002 { 0.006}

#73 H73(+1)[ 1] = +0.005 { 0.006}

#87 H87(+1)[ 1] = +0.006 { 0.007}

#45 C20(+0)[ 4] = +0.008 { 0.005}

#95 H95(+1)[ 1] = +0.009 { 0.007}

#67 H67(+1)[ 1] = +0.011 { 0.006}

#43 C18(+0)[ 4] = +0.011 { 0.005}

#42 C17(+0)[ 4] = +0.012 { 0.005}

#38 C13(+0)[ 4] = +0.012 { 0.005}

#94 H94(+1)[ 1] = +0.013 { 0.006}

#135 H135(+1)[ 1] = +0.015 { 0.008}

#146 H146(+1)[ 1] = +0.015 { 0.006}

#86 H86(+1)[ 1] = +0.015 { 0.006}

#68 H68(+1)[ 1] = +0.016 { 0.007}

#102 H102(+1)[ 1] = +0.016 { 0.008}

#89 H89(+1)[ 1] = +0.016 { 0.007}

#70 H70(+1)[ 1] = +0.016 { 0.006}

#79 H79(+1)[ 1] = +0.018 { 0.006}

#80 H80(+1)[ 1] = +0.018 { 0.007}

#84 H84(+1)[ 1] = +0.019 { 0.007}

#77 H77(+1)[ 1] = +0.020 { 0.006}

#85 H85(+1)[ 1] = +0.020 { 0.007}

#40 C15(+0)[ 4] = +0.020 { 0.005}

#90 H90(+1)[ 1] = +0.020 { 0.006}

#138 H138(+1)[ 1] = +0.020 { 0.008}

#93 H93(+1)[ 1] = +0.020 { 0.007}

#41 C16(+0)[ 4] = +0.021 { 0.005}

#44 C19(+0)[ 4] = +0.021 { 0.005}

#105 H105(+1)[ 1] = +0.022 { 0.007}

#98 H98(+1)[ 1] = +0.022 { 0.006}

#123 H123(+1)[ 1] = +0.023 { 0.007}

#36 C11(+0)[ 4] = +0.023 { 0.005}

#69 H69(+1)[ 1] = +0.023 { 0.005}

#152 H152(+1)[ 1] = +0.025 { 0.008}

#155 H155(+1)[ 1] = +0.025 { 0.007}

#116 H116(+1)[ 1] = +0.026 { 0.007}

#104 H104(+1)[ 1] = +0.027 { 0.007}

#71 H71(+1)[ 1] = +0.027 { 0.007}

#97 H97(+1)[ 1] = +0.027 { 0.007}

#111 H111(+1)[ 1] = +0.028 { 0.007}

#75 H75(+1)[ 1] = +0.028 { 0.007}

#131 H131(+1)[ 1] = +0.029 { 0.008}

#149 H149(+1)[ 1] = +0.029 { 0.006}

#140 H140(+1)[ 1] = +0.030 { 0.008}

#147 H147(+1)[ 1] = +0.032 { 0.009}

#124 H124(+1)[ 1] = +0.032 { 0.007}

#91 H91(+1)[ 1] = +0.032 { 0.008}

#153 H153(+1)[ 1] = +0.032 { 0.007}

#39 C14(+0)[ 4] = +0.033 { 0.005}

#74 H74(+1)[ 1] = +0.033 { 0.008}

#151 H151(+1)[ 1] = +0.034 { 0.009}

#148 H148(+1)[ 1] = +0.035 { 0.008}

#143 H143(+1)[ 1] = +0.035 { 0.007}

#100 H100(+1)[ 1] = +0.035 { 0.009}

#109 H109(+1)[ 1] = +0.035 { 0.008}

#129 H129(+1)[ 1] = +0.035 { 0.008}

#107 H107(+1)[ 1] = +0.035 { 0.007}

#144 H144(+1)[ 1] = +0.035 { 0.007}

#99 H99(+1)[ 1] = +0.036 { 0.009}

#142 H142(+1)[ 1] = +0.036 { 0.008}

#136 H136(+1)[ 1] = +0.036 { 0.008}

#154 H154(+1)[ 1] = +0.036 { 0.007}

#121 H121(+1)[ 1] = +0.036 { 0.008}

#134 H134(+1)[ 1] = +0.036 { 0.008}

#150 H150(+1)[ 1] = +0.036 { 0.007}

#118 H118(+1)[ 1] = +0.036 { 0.009}

#114 H114(+1)[ 1] = +0.037 { 0.008}

#126 H126(+1)[ 1] = +0.037 { 0.008}

#112 H112(+1)[ 1] = +0.037 { 0.008}

#133 H133(+1)[ 1] = +0.037 { 0.008}

#127 H127(+1)[ 1] = +0.037 { 0.008}

#145 H145(+1)[ 1] = +0.037 { 0.008}

#122 H122(+1)[ 1] = +0.038 { 0.008}

#139 H139(+1)[ 1] = +0.038 { 0.008}

#119 H119(+1)[ 1] = +0.038 { 0.010}

#115 H115(+1)[ 1] = +0.039 { 0.008}

#110 H110(+1)[ 1] = +0.040 { 0.008}

#96 H96(+1)[ 1] = +0.040 { 0.008}

#113 H113(+1)[ 1] = +0.041 { 0.008}

#103 H103(+1)[ 1] = +0.041 { 0.008}

#117 H117(+1)[ 1] = +0.041 { 0.010}

#125 H125(+1)[ 1] = +0.042 { 0.008}

#141 H141(+1)[ 1] = +0.042 { 0.008}

#108 H108(+1)[ 1] = +0.043 { 0.008}

#137 H137(+1)[ 1] = +0.043 { 0.007}

#78 H78(+1)[ 1] = +0.043 { 0.008}

#128 H128(+1)[ 1] = +0.044 { 0.008}

#101 H101(+1)[ 1] = +0.044 { 0.010}

#120 H120(+1)[ 1] = +0.044 { 0.008}

#92 H92(+1)[ 1] = +0.045 { 0.008}

#132 H132(+1)[ 1] = +0.045 { 0.008}

#130 H130(+1)[ 1] = +0.046 { 0.008}

#106 H106(+1)[ 1] = +0.048 { 0.007}

#4 Ti4(+4)[ 7] = +2.337 { 0.033}

#1 Ti1(+4)[ 6] = +2.450 { 0.039}

#3 Ti3(+4)[ 6] = +2.465 { 0.038}

#2 Ti2(+4)[ 6] = +2.640 { 0.041}

#5 Ti5(+4)[ 5] = +2.758 { 0.048}

Partial electrostatic balance: <EB> = -399.05 eV = -38502.1 kJ.mol-1

Reduced electrostatic balance: <EB/2> = -199.52 eV = -19251.0 kJ.mol-1

Global ionicity: <GI> = 26.21 %

Statistical report: <Atom>[num] = mean ± 3×stdev (stdev) <avdev>

<q(H)>[90] = 0.028 ± 0.041 (0.014) <0.011>

<f(H)>[90] = 0.007 ± 0.003 (0.001) <0.001>

<q(C)>[40] = -0.071 ± 0.164 (0.055) <0.047>

<f(C)>[40] = 0.003 ± 0.003 (0.001) <0.001>

<q(O)>[20] = -0.616 ± 0.168 (0.056) <0.048>

<f(O)>[20] = 0.001 ± 0.003 (0.001) <0.001>

<q(Ti)>[5] = 2.530 ± 0.502 (0.167) <0.135>

<f(Ti)>[5] = 0.040 ± 0.016 (0.005) <0.004>

WinPacha downhill simplex report for DOFWOK

V= 4414.32 Å³ (Z = 4) -> No R-value

Initial function value is 260795

Number of function evaluations: 184

Vertices of final 8-d simplex and

function values at the vertices:

i 1 2 3 4 5 6 7 function

1 2.646119 51.535141 3.356128 -49.815197 67.925140 -54.317093 -40.687172 258501

2 2.588068 50.175964 3.159174 -47.944050 66.960739 -55.439327 -41.057079 258503

3 2.824836 48.217216 3.204040 -48.578957 63.136467 -49.976410 -38.741493 258503

4 2.391895 51.396198 3.507165 -50.677681 67.890564 -54.852489 -40.314190 258503

5 3.314832 50.278374 3.425318 -48.395142 63.950958 -53.995560 -38.585030 258503

6 3.636699 48.477314 3.086937 -45.021809 65.363159 -52.117188 -41.187172 258503

7 3.549190 50.355015 3.266853 -48.632832 61.900711 -53.168507 -37.216755 258502

8 3.889566 49.036407 3.404861 -47.845749 62.006699 -52.397339 -38.127586 258502

9 3.460913 50.233494 3.473634 -47.790920 63.781624 -54.367611 -38.633484 258504

i 8 function

1 43.803989 258501

2 45.697769 258503

3 42.776176 258503

4 44.653656 258503

5 44.419582 258503

6 42.936089 258503

7 44.175819 258502

8 44.297249 258502

9 44.594105 258504

WinPacha atomic charges calculations report for DOFWOK

V= 4414.32 Å³ (Z = 4) -> No R-value

***Atomic electronegativies (eV) and radii (pm) ***

Ti( 8.170, 147.7)

O( 21.360, 45.0)

C( 15.050, 62.0)

H( 13.610, 53.0)

Madelung summation with gaussian inner-charge scaling (G = 0.13 Å-1)

Reciprocal space exploration: -2 <= (h, k, l) <= 2

Madelung constant A = 553.9126140/4 = 138.4781535 (dmin = 1.070 Å )

min = -0.43426 Å-1 < mean = 2.51499 Å-1 < max = 8.43172 Å-1

Total electrostatic balance = -7455.58 eV = -719348.2 kJ.mol-1

Mean electronegativity: <EN> = 13.69 eV

Global hardness: <GH> = 2.53 eV (G = 0.13 Å-1)

Electronic signature: #n Label(±ox)[CN] = ±q {±f}

Atom Charge Fukui

#2 O1(-2)[ 2] = -0.604 { 0.001}

#15 O2(-2)[ 2] = -0.603 { 0.000}

#26 C23(-3)[ 4] = -0.116 { 0.003}

#10 C8(-3)[ 4] = -0.114 { 0.003}

#14 C12(-3)[ 4] = -0.114 { 0.003}

#24 C21(-3)[ 4] = -0.113 { 0.003}

#27 C24(-3)[ 4] = -0.112 { 0.003}

#13 C11(-3)[ 4] = -0.112 { 0.003}

#11 C9(-3)[ 4] = -0.111 { 0.003}

#23 C20(-3)[ 4] = -0.111 { 0.003}

#6 C4(-1)[ 3] = -0.053 { 0.008}

#7 C5(-1)[ 3] = -0.053 { 0.007}

#5 C3(-1)[ 3] = -0.052 { 0.008}

#18 C15(-1)[ 3] = -0.049 { 0.008}

#20 C17(-1)[ 3] = -0.049 { 0.008}

#19 C16(-1)[ 3] = -0.048 { 0.008}

#9 C7(-1)[ 4] = -0.045 { 0.006}

#22 C19(-1)[ 4] = -0.042 { 0.006}

#12 C10(-1)[ 4] = -0.041 { 0.006}

#25 C22(-1)[ 4] = -0.041 { 0.006}

#21 C18(+0)[ 3] = -0.032 { 0.008}

#4 C2(+0)[ 3] = -0.031 { 0.008}

#8 C6(+0)[ 3] = -0.029 { 0.008}

#17 C14(+0)[ 3] = -0.025 { 0.008}

#37 H37(+1)[ 1] = -0.015 { 0.007}

#35 H35(+1)[ 1] = +0.007 { 0.007}

#34 H34(+1)[ 1] = +0.018 { 0.007}

#36 H36(+1)[ 1] = +0.018 { 0.008}

#39 H39(+1)[ 1] = +0.024 { 0.009}

#48 H48(+1)[ 1] = +0.029 { 0.009}

#29 H29(+1)[ 1] = +0.035 { 0.010}

#46 H46(+1)[ 1] = +0.035 { 0.009}

#51 H51(+1)[ 1] = +0.036 { 0.009}

#60 H60(+1)[ 1] = +0.036 { 0.010}

#28 H28(+1)[ 1] = +0.038 { 0.010}

#54 H54(+1)[ 1] = +0.038 { 0.010}

#55 H55(+1)[ 1] = +0.039 { 0.010}

#58 H58(+1)[ 1] = +0.039 { 0.010}

#30 H30(+1)[ 1] = +0.040 { 0.009}

#40 H40(+1)[ 1] = +0.040 { 0.010}

#42 H42(+1)[ 1] = +0.040 { 0.010}

#56 H56(+1)[ 1] = +0.040 { 0.009}

#43 H43(+1)[ 1] = +0.040 { 0.009}

#49 H49(+1)[ 1] = +0.041 { 0.010}

#32 H32(+1)[ 1] = +0.041 { 0.010}

#38 H38(+1)[ 1] = +0.042 { 0.010}

#41 H41(+1)[ 1] = +0.042 { 0.010}

#45 H45(+1)[ 1] = +0.042 { 0.010}

#52 H52(+1)[ 1] = +0.043 { 0.010}

#31 H31(+1)[ 1] = +0.043 { 0.010}

#33 H33(+1)[ 1] = +0.043 { 0.010}

#3 C1(+1)[ 3] = +0.043 { 0.009}

#61 H61(+1)[ 1] = +0.043 { 0.010}

#50 H50(+1)[ 1] = +0.045 { 0.010}

#59 H59(+1)[ 1] = +0.045 { 0.010}

#44 H44(+1)[ 1] = +0.045 { 0.010}

#16 C13(+1)[ 3] = +0.046 { 0.009}

#57 H57(+1)[ 1] = +0.050 { 0.010}

#47 H47(+1)[ 1] = +0.050 { 0.010}

#53 H53(+1)[ 1] = +0.056 { 0.009}

#1 Ti1(+4)[ 4] = +2.718 { 0.065}

Partial electrostatic balance: <EB> = -180.01 eV = -17367.8 kJ.mol-1

Reduced electrostatic balance: <EB/4> = -45.00 eV = -4341.9 kJ.mol-1

Global ionicity: <GI> = 15.54 %

Statistical report: <Atom>[num] = mean ± 3×stdev (stdev) <avdev>

<q(H)>[34] = 0.037 ± 0.040 (0.013) <0.008>

<f(H)>[34] = 0.009 ± 0.003 (0.001) <0.001>

<q(C)>[24] = -0.058 ± 0.140 (0.047) <0.036>

<f(C)>[24] = 0.006 ± 0.007 (0.002) <0.002>

<q(O)>[2] = -0.603 ± 0.002 (0.001) <0.000>

<f(O)>[2] = 0.001 ± 0.000 (0.000) <0.000>

<q(Ti)>[1] = 2.718 ± 0.000 (0.000) <0.000>

<f(Ti)>[1] = 0.065 ± 0.000 (0.000) <0.000>
